# Supplementary material for: Fenfluramine for Treatment-Resistant Seizures in Patients With Dravet Syndrome Receiving Stiripentol-Inclusive Regimens: A Randomized Clinical Trial
Source: PubMed Central journal article supplement — JAMA Neurol. 2019 Dec 2;77(3):300–8. doi: 10.1001/jamaneurol.2019.4113 (PMC6902175; doi:10.1001/jamaneurol.2019.4113), 2019-12-02
Supplement: jamaneurol-77-300-s001.pdf [file jamaneurol-77-300-s001.pdf]

## Supplementary Online Content

Nabbout R, Mistry A, Zuberi S, et al; for the FAiRE, DS Study Group. Fenfluramine for treatment-resistant seizures in patients with Dravet syndrome receiving stiripentol-inclusive regimens: a randomized clinical trial. *JAMA Neurol*. Published online December 2, 2019. doi:10.1001/jamaneurol.2019.4113

**eFigure 1.** Study design

**eFigure 2.** Greater Percentage Change in MCSF Over Time in Fenfluramine vs Placebo Treatment Groups

**eFigure 3.** Clinical Global Impression of Improvement

**eTable 1.** Diagnostic Criteria for Inclusion in Trial

**eTable 2.** Titration and Tapering Algorithms

This supplementary material has been provided by the authors to give readers additional information about their work.

eFigure 1. Study Design

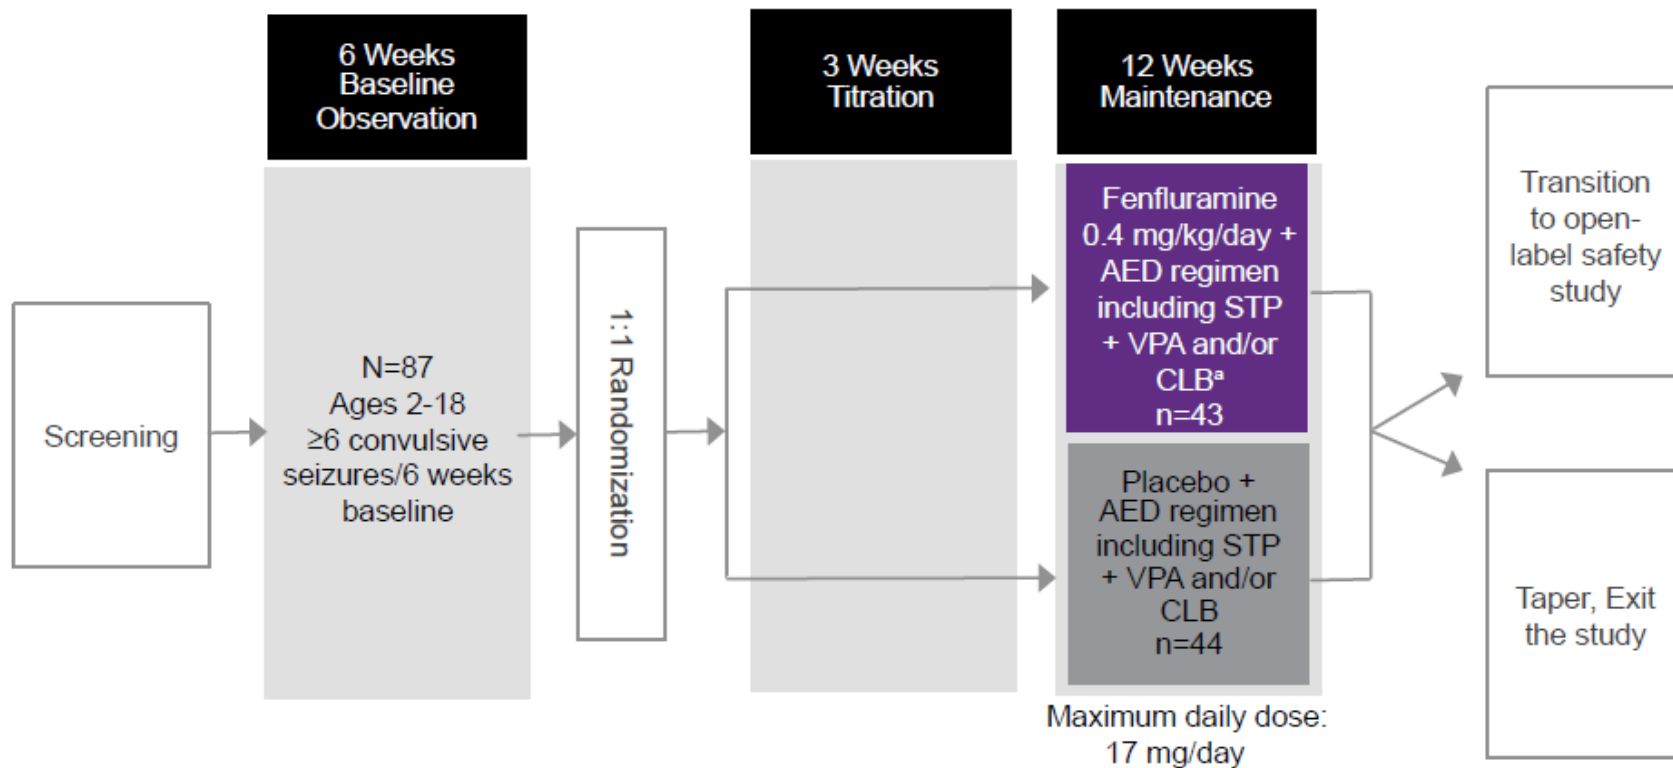

AED, antiepileptic drug; CLB, clobazam; STP, stiripentol; VPA, valproate.

<sup>a</sup>Protocol required, at a minimum, STP plus CLB or VPA. Initially, protocol required STP plus both CLB and VPA, but many patients could not tolerate or would not take the full regimen.

**eFigure 2. Greater Percentage Change in MCSF Over Time in Fenfluramine vs Placebo Treatment Groups**

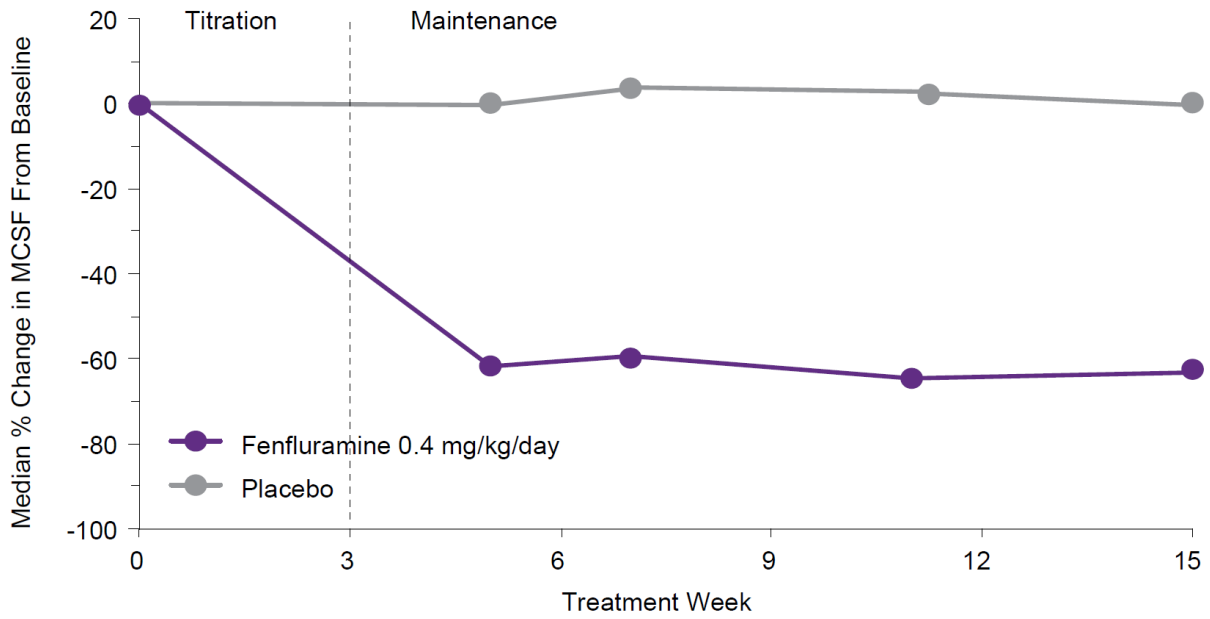

MCSF, monthly convulsive seizure frequency.

**eFigure 3. Clinical Global Impression of Improvement.** Clinically meaningful improvements (Very much improved or Much improved) on Clinical Global Impression (CGI) of patient disposition scored by (A) investigators and (B) parents/caregivers at Visit 12 (combined titration and maintenance periods). CGI, clinical global impression; *P*-values by Cochran-Mantel Haenszel test (placebo vs fenfluramine).

**A. Investigator CGI**

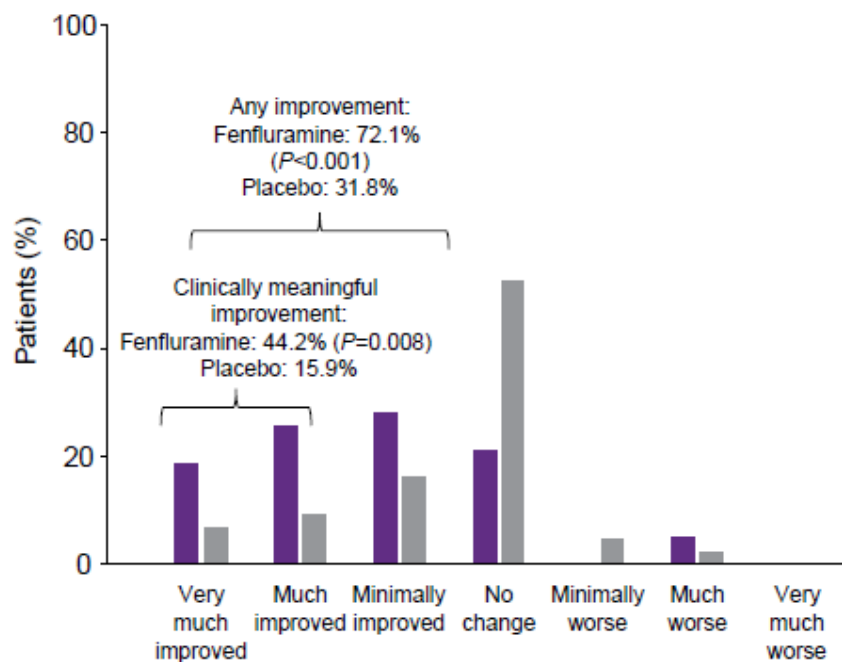

**B. Parent/Caregiver CGI**

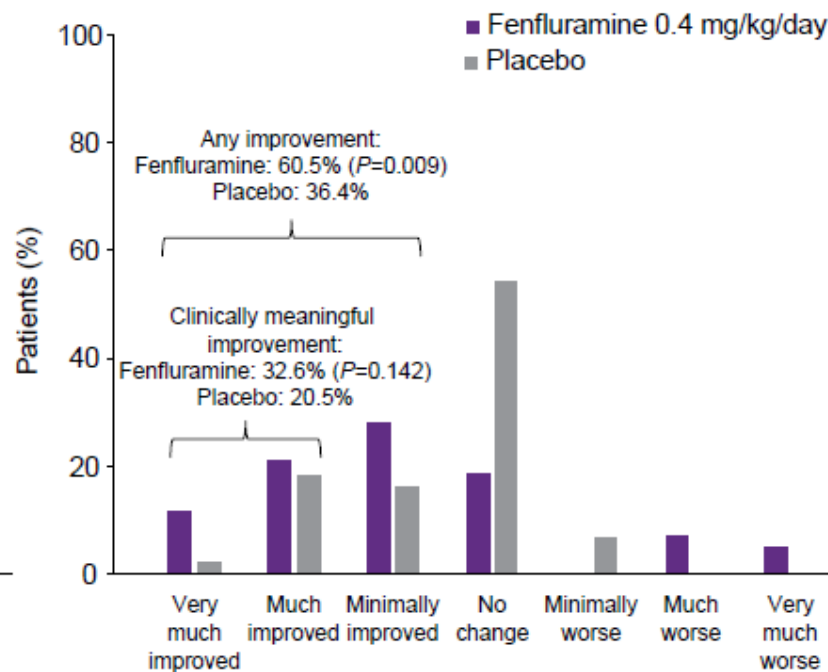

**eTable 1. Diagnostic Criteria for Inclusion in Trial**

| <b>Inclusion Diagnostic Criteria</b>                |                                                                                                                                                                                                                                                                                                                                                                                                                                                                                                                                                                                                                                                                                                                                                                        |
|-----------------------------------------------------|------------------------------------------------------------------------------------------------------------------------------------------------------------------------------------------------------------------------------------------------------------------------------------------------------------------------------------------------------------------------------------------------------------------------------------------------------------------------------------------------------------------------------------------------------------------------------------------------------------------------------------------------------------------------------------------------------------------------------------------------------------------------|
| <b>Clinical Diagnosis</b>                           | Documented medical history to support a clinical diagnosis of Dravet syndrome, where convulsive seizures were not completely controlled by current AED regimen                                                                                                                                                                                                                                                                                                                                                                                                                                                                                                                                                                                                         |
| <b>Patient Meets All of the Following Criteria:</b> | <ol style="list-style-type: none"> <li>1. Onset of seizures in the first year of life in an otherwise healthy infant.</li> <li>2. A history of seizures that were either generalized tonic-clonic or unilateral clonic or bilateral clonic and were prolonged</li> <li>3. Initial development was normal</li> <li>4. History of normal brain magnetic resonance imaging without cortical brain malformation</li> <li>5. Lack of alternative diagnosis</li> </ol>                                                                                                                                                                                                                                                                                                       |
| <b>Patient Meets ≥1 of the Following Criteria:</b>  | <ol style="list-style-type: none"> <li>1. Emergence of another seizure type, including myoclonic, generalized tonic-clonic, tonic, atonic, absence and/or focal had developed after the first seizure type</li> <li>2. Prolonged exposure to warm temperatures induces seizures and/or seizures were associated with fevers due to illness or vaccines, hot baths, high levels of activity and sudden temperature changes and/or seizures were induced by strong natural and/or fluorescent lighting, as well as certain visual patterns</li> <li>3. Genetic test results consistent with a diagnosis of Dravet syndrome (pathogenic, likely pathogenic, variant of unknown significance, or inconclusive but unlikely to support an alternative diagnosis)</li> </ol> |
| <b>Randomization Criteria</b>                       |                                                                                                                                                                                                                                                                                                                                                                                                                                                                                                                                                                                                                                                                                                                                                                        |
| <b>Convulsive Seizures During Baseline</b>          | A stable Baseline with ≥ 6 convulsive seizures during the 6-week Baseline, with a ≥2 seizures in the first 3 weeks and ≥2 seizures in the second 3 weeks                                                                                                                                                                                                                                                                                                                                                                                                                                                                                                                                                                                                               |
| <b>Cardiovascular/ Cardiopulmonary</b>              | No cardiovascular disease based on ECHO, ECG, or physical examination, including but not limited to trace mitral or aortic valve regurgitation or signs of pulmonary hypertension; approved for study entry by central cardiac reader                                                                                                                                                                                                                                                                                                                                                                                                                                                                                                                                  |
| <b>Seizure Diary Compliance</b>                     | Parent/Caregiver was ≥90% compliant with electronic diary completion during baseline                                                                                                                                                                                                                                                                                                                                                                                                                                                                                                                                                                                                                                                                                   |
| <b>Approval</b>                                     | Approved for study inclusion by Epilepsy Study Consortium                                                                                                                                                                                                                                                                                                                                                                                                                                                                                                                                                                                                                                                                                                              |

AED, antiepileptic drug; ECG, electrocardiogram; ECHO, echocardiogram.

**eTable 2: Titration and Tapering Algorithms**

|                                              | <b>Step 1</b>                                                              | <b>Step 2</b>                                                          | <b>Step 3</b>                                                               |
|----------------------------------------------|----------------------------------------------------------------------------|------------------------------------------------------------------------|-----------------------------------------------------------------------------|
| <b>Titration<sup>a,b</sup></b>               | <b>Study Days 1-7</b>                                                      | <b>Study Days 8-14</b>                                                 | <b>Study Days 15-21</b>                                                     |
| Placebo<br>Fenfluramine 0.4<br>mg/kg/day     | Placebo<br>Fenfluramine 0.2<br>mg/kg/day                                   | Placebo<br>Fenfluramine 0.3<br>mg/kg/day                               | Placebo<br>Fenfluramine 0.4<br>mg/kg/day                                    |
| <b>Tapering<sup>a</sup></b>                  | <b>Days 1 to 4 after<br/>study completion<br/>or early<br/>termination</b> | <b>Days 5 to 8 after study<br/>completion or early<br/>termination</b> | <b>Days 9 to 14 after<br/>study completion<br/>or early<br/>termination</b> |
| Placebo<br><br>Fenfluramine 0.4<br>mg/kg/day | Placebo<br><br>Fenfluramine 0.3<br>mg/kg/day                               | Placebo<br><br>Fenfluramine 0.2<br>mg/kg/day                           | No study drug<br>administration<br><br>No study drug<br>administration      |

BID, twice daily.

<sup>a</sup>Maximum daily dose of fenfluramine, 17 mg.

<sup>b</sup>The dosing regimen, BID for all doses.
