# Supplementary material for: Fenfluramine for Treatment-Resistant Seizures in Patients With Dravet Syndrome Receiving Stiripentol-Inclusive Regimens: A Randomized Clinical Trial
Source: PubMed Central journal article supplement — JAMA Neurol. 2019 Dec 2;77(3):300–8. doi: 10.1001/jamaneurol.2019.4113 (PMC6902175; doi:10.1001/jamaneurol.2019.4113), 2019-12-02
Supplement: jamaneurol-77-300-s004.pdf [file jamaneurol-77-300-s004.pdf]

Nabbout; the FAiRE, DS Study Group. Fenfluramine for treatment-resistant seizures in patients with dravet syndrome receiving stiripentol-inclusive regimens: a randomized clinical trial [published online December 2, 2019]. *JAMA Neurol*. doi:10.1001/jamaneurol.2019.4113

## **Data Sharing Statement**

### **Data**

**Data available:** No

### **Additional Information**

**Explanation for why data not available:** Zogenix is currently in the process of developing a data sharing plan and process.
